# Supplementary material
Source: MDPI journal article supplement (https://www.mdpi.com/2073-4336/1/1/34)
Supplement: s3 [file s3]

## Screenshots of the experiment

### 1. Sorting of the groups of words.

Please sort the following words into meaningful phrases in good German and write them in the line next to the group of words. Omit one word in each line.

Please take no more than 20 seconds per line. Afterwards, simply move on to the next group of words.

If you think that there are several possibilities, please choose one.

| Group of words                                          | Phrase (to be filled in)      |
|---------------------------------------------------------|-------------------------------|
| Firma -- Kunde -- besser -- groß -- bezahlen            | Große Firmen bezahlen besser. |
| verschieden -- benutzen -- Material -- Hund -- Künstler | <input type="text"/>          |
| Gehalt -- haben -- Stuhl -- Berater -- hoch             | <input type="text"/>          |
| Auto -- Glas -- schnell -- teuer -- sein                | <input type="text"/>          |
| trinken -- Müsli -- schmecken -- Frühstück -- zum       | <input type="text"/>          |
| Million -- ausschütten -- können -- Lotterie -- sollen  | <input type="text"/>          |
| Blatt -- Baum -- haben -- grün -- Lächeln               | <input type="text"/>          |
| oft -- Süßes -- Treppe -- Kinder -- mögen               | <input type="text"/>          |
| erhöhen -- hoch -- fast -- Motivation -- Lohn           | <input type="text"/>          |
| Stuhl -- trinken -- gut -- Büro -- benötigen            | <input type="text"/>          |
| werden -- Schmuck -- bewachen -- kostbar -- Anzug       | <input type="text"/>          |
| manchmal -- bringen -- essen -- Wolke -- Regen          | <input type="text"/>          |
| erfolgreich -- Baum -- Gewinn -- machen -- Firma        | <input type="text"/>          |
| werden -- schnell -- klug -- reich -- Investor          | <input type="text"/>          |

### 2. Deciding upon the lottery *investment*. The screen for *minimum* was similar.

You are now in the second stage of the experiment. For this stage you receive an endowment of 5,00 Euro.

You can now decide how much of your endowment to invest in the lottery.

Reminder: With a probability of 50% the lottery returns three times your investment, with a probability of 50% it returns nothing.

Please state how much you want to invest in the lottery:

3. Assessment of positive (PA) and negative (NA) emotions. There were two such screens.

On the following two screens you see a number of words that describe different feelings and emotions. Read each item and then mark the appropriate intensity in the scale next to the item. You can choose among five answers.

Please state how you feel at the moment.

|              | very slightly or<br>not at all | a little              | moderately            | quite a bit           | extremely             |
|--------------|--------------------------------|-----------------------|-----------------------|-----------------------|-----------------------|
| active       | <input type="radio"/>          | <input type="radio"/> | <input type="radio"/> | <input type="radio"/> | <input type="radio"/> |
| distressed   | <input type="radio"/>          | <input type="radio"/> | <input type="radio"/> | <input type="radio"/> | <input type="radio"/> |
| interested   | <input type="radio"/>          | <input type="radio"/> | <input type="radio"/> | <input type="radio"/> | <input type="radio"/> |
| enthusiastic | <input type="radio"/>          | <input type="radio"/> | <input type="radio"/> | <input type="radio"/> | <input type="radio"/> |
| upset        | <input type="radio"/>          | <input type="radio"/> | <input type="radio"/> | <input type="radio"/> | <input type="radio"/> |
| strong       | <input type="radio"/>          | <input type="radio"/> | <input type="radio"/> | <input type="radio"/> | <input type="radio"/> |
| guilty       | <input type="radio"/>          | <input type="radio"/> | <input type="radio"/> | <input type="radio"/> | <input type="radio"/> |
| afraid       | <input type="radio"/>          | <input type="radio"/> | <input type="radio"/> | <input type="radio"/> | <input type="radio"/> |
| hostile      | <input type="radio"/>          | <input type="radio"/> | <input type="radio"/> | <input type="radio"/> | <input type="radio"/> |

4. Funneled debriefing. All six questions were on different screens.

What do you think is the purpose of this experiment?

WEITER
